# Supplementary material for: MicroRNA Biomarkers as Promising Tools for Early Colorectal Cancer Screening—A Comprehensive Review
Source: MDPI journal article supplement (doi:10.3390/ijms241311023), 2023-07-03
Supplement: s1 [file s1]

**Table S1.** Performance of all microRNAs evaluated the literature search in the context CRC screening both in stool and blood samples.

| MicroRNA   | Author, Year             | N   | Country     | Compared Groups               | Sample | SENS (%) | SPEC (%) | AUC   | p      |
|------------|--------------------------|-----|-------------|-------------------------------|--------|----------|----------|-------|--------|
| miR-21-5p  | Bastaminejad 2017 [31]   | 80  | Iran        | CRC <i>vs</i> H               | Serum  | 86.05    | 72.97    | 0.783 | -      |
|            |                          |     |             |                               | Stool  | 86.05    | 81.08    | 0.829 | -      |
|            |                          |     |             | CRC I-II <i>vs</i> CRC III-IV | Stool  | 88.10    | 81.60    | 0.794 | -      |
|            | Choi, 2019 [27]          | 58  | South Korea | CRC <i>vs</i> NL              | Stool  | 79.30    | 48.30    | 0.690 | -      |
|            | Link, 2010 [56]          | 38  | USA         | -                             | Stool  | -        | -        | -     | -      |
|            | Koga, 2010 [67]          | 340 | Japan       | CRC <i>vs</i> NL              | Stool  | 14.70    | 95.00    | -     | -      |
|            | Liu, 2016 [73]           | 270 | China       | CRC <i>vs</i> NL              | Stool  | 90.30    | 75.20    | 0.877 | -      |
|            |                          |     |             | CRA <i>vs</i> NL              |        | 85.10    | 62.70    | 0.769 | -      |
|            | Duran-Sanchon, 2020 [20] | 767 | Spain       | AA <i>vs</i> NL               | Stool  | 72.00    | 48.00    | 0.620 | <0.05  |
|            | Liu, 2013 [83]           | 340 | China       | CRC <i>vs</i> H               | Serum  | 65.00    | 85.00    | 0.802 | -      |
|            | Jin, 2020 [61]           | 195 | China       | CRC <i>vs</i> NL              | Serum  | 90.63    | 86.20    | 0.928 | <0.05  |
|            | Yamada, 2015 [93]        | 188 | USA         | CRC <i>vs</i> NL              | Serum  | -        | -        | 0.706 | -      |
|            | Wang, 2014 [122]         | 202 | China       | CRC <i>vs</i> H               | Serum  | -        | -        | -     | -      |
|            | Dohmen, 2022 [91]        | 69  | Germany     | CRC <i>vs</i> NL              | Serum  | -        | -        | 0.550 | -      |
|            | Luo, 2013 [116]          | 280 | Germany     | -                             | Plasma | -        | -        | -     | -      |
|            | Bader El din, 2020 [66]  | 129 | Egypt       | CRC <i>vs</i> NL              | Serum  | 80.70    | 100.00   | 0.936 | -      |
|            | Farouk, 2020 [74]        | 70  | Egypt       | CRC <i>vs</i> H               | Serum  | 82.86    | 97.15    | 0.893 | <0.001 |
|            | Nonaka, 2015 [65]        | 146 | Japan       | CRC <i>vs</i> H               | Serum  | 54.70    | 84.40    | 0.675 | -      |
| miR-92a-3p | Shiosaki, 2020 [72]      | 91  | Japan       | CRC <i>vs</i> NL              | Serum  | 72.60    | 70.60    | 0.727 | -      |
|            | Toiyama, 2013 [75]       | 279 | Japan       | CRC <i>vs</i> NL              | Serum  | 82.80    | 90.60    | 0.927 | -      |
|            |                          |     |             | AA <i>vs</i> NL               |        | 76.80    | 81.10    | 0.803 | -      |
|            | Chang, 2016 [29]         | 323 | Taiwan      | CRC <i>vs</i> NL              | Stool  | -        | -        | 0.748 | 0.000  |
|            |                          |     |             |                               | Plasma | -        | -        | 0.751 | 0.000  |
|            | Choi, 2019 [27]          | 58  | South Korea | CRC <i>vs</i> NL              | Stool  | 89.70    | 51.70    | 0.760 | -      |
|            | Li, 2023 [84]            | 144 | China       | CRC <i>vs</i> NL              | Stool  | 88.90    | 73.60    | 0.861 | <0.001 |
|            | Liu, 2013 [83]           | 340 | China       | CRC <i>vs</i> H               | Serum  | 65.50    | 82.50    | 0.786 | -      |
|            | Huang, 2010 [82]         | 196 | China       | CRC <i>vs</i> NL              | Plasma | 84.00    | 71.20    | 0.838 | -      |
|            |                          |     |             | AA <i>vs</i> NL               |        | 64.60    | 81.40    | 0.749 | -      |
|            | Dohmen, 2022 [91]        | 69  | Germany     | CRC <i>vs</i> NL              | Serum  | -        | -        | 0.640 | -      |
|            | Luo, 2013 [116]          | 280 | Germany     | -                             | Plasma | -        | -        | -     | -      |
|            | Karimi, 2019 [41]        | 38  | Iran        | -                             | Serum  | -        | -        | -     | -      |
|            | Koga, 2010 [67]          | 340 | Japan       | CRC <i>vs</i> NL              | Stool  | 15.70    | 90.80    | -     | -      |
|            | Shiosaki, 2020 [72]      | 91  | Japan       | -                             | Serum  | -        | -        | -     | -      |
|            | Wang, 2014 [122]         | 202 | China       | -                             | Serum  | -        | -        | -     | -      |
|            | Yamada, 2015 [93]        | 188 | USA         | -                             | Serum  | -        | -        | -     | -      |
| miR-18a-5p | Zheng, 2014 [104]        | 697 | China       | CRC <i>vs</i> H               | Serum  | -        | -        | 0.871 | -      |
|            | Chang, 2016 [29]         | 323 | Taiwan      | CRC <i>vs</i> NL              | Plasma | -        | -        | 0.715 | 0.000  |
|            | Zhang, 2013 [94]         | 164 | China       | CRC <i>vs</i> H               | Plasma | 73.10    | 79.10    | 0.804 | 0.004  |

Table S1. Cont.

| MicroRNA    | Author, Year                    | N   | Country     | Compared Groups                     | Sample | SENS (%)       | SPEC (%)       | AUC            | p      |
|-------------|---------------------------------|-----|-------------|-------------------------------------|--------|----------------|----------------|----------------|--------|
| miR-18a-5p  | Herreros-Villanueva, 2019 [123] | 297 | Spain       | -                                   | Plasma | -              | -              | -              | -      |
|             | Koga, 2010 [67]                 | 340 | Japan       | CRC <i>vs</i> NL                    | Stool  | 47.20          | 94.10          | -              | -      |
|             | Yau, 2014 [106]                 | 595 | China       | CRC <i>vs</i> NL                    | Stool  | 61.00          | 69.00          | 0.670          | -      |
|             | Karimi, 2019 [41]               | 38  | Iran        | -                                   | Serum  | -              | -              | -              | -      |
|             | Luo, 2013 [116]                 | 280 | Germany     | -                                   | Plasma | -              | -              | -              | -      |
|             | Zhang, 2019 [95]                | 271 | China       | CRC <i>vs</i> H                     | Plasma | -              | -              | 0.777          | -      |
|             | Yamada, 2015 [93]               | 188 | USA         | -                                   | Serum  | -              | -              | -              | -      |
| miR-29a-3p  | Zhu, 2016 [105]                 | 131 | China       | CRC <i>vs</i> NL                    | Stool  | 85.00          | 61.00          | 0.777          | <0.001 |
|             | Duran-Sanchon, 2020 [20]        | 767 | Spain       | AA <i>vs</i> NL                     | Stool  | 68.00          | 53.00          | 0.620          | <0.05  |
|             | Dohmen, 2022 [91]               | 69  | Germany     | CRC <i>vs</i> NL                    | Serum  | -              | -              | 0.640          | -      |
|             | Herreros-Villanueva, 2019 [123] | 297 | Spain       | -                                   | Plasma | -              | -              | -              | -      |
|             | Luo, 2013 [116]                 | 280 | Germany     | -                                   | Plasma | -              | -              | -              | -      |
|             | Huang, 2010 [82]                | 196 | China       | CRC <i>vs</i> NL<br>AA <i>vs</i> NL | Plasma | 69.00<br>73.00 | 89.10<br>79.70 | 0.844<br>0.769 | -<br>- |
|             | Shiosaki, 2020 [72]             | 91  | Japan       | -                                   | Serum  | -              | -              | -              | -      |
|             | Yamada, 2015 [93]               | 188 | USA         | CRC <i>vs</i> NL                    | Serum  | -              | -              | 0.741          | -      |
|             | Chang, 2016 [29]                | 323 | Taiwan      | CRC <i>vs</i> NL                    | Stool  | -              | -              | 0.639          | 0.000  |
| miR-20a-5p  | Koga, 2010 [67]                 | 340 | Japan       | CRC <i>vs</i> NL                    | Stool  | 18.30          | 91.60          | -              | -      |
|             | Yau, 2015 [119]                 | 595 | China       | CRC <i>vs</i> NL                    | Stool  | 55.00          | 82.00          | 0.730          | -      |
|             | Luo, 2013 [116]                 | 280 | Germany     | -                                   | Plasma | -              | -              | -              | -      |
|             | Liu, 2018 [92]                  | 150 | China       | CRC <i>vs</i> H                     | Plasma | -              | -              | 0.929          | -      |
|             | Maminezhad, 2020 [32]           | 90  | Iran        | CRC <i>vs</i> H                     | Serum  | -              | -              | 0.830          | <0.001 |
|             | Yamada, 2015 [93]               | 188 | USA         | -                                   | Serum  | -              | -              | -              | -      |
|             | Chang, 2016 [29]                | 323 | Taiwan      | CRC <i>vs</i> NL                    | Stool  | -              | -              | 0.796          | 0.000  |
| miR-223-3p  |                                 |     |             |                                     | Plasma | -              | -              | 0.707          | 0.000  |
|             | Phua, 2014 [44]                 | 45  | Singapore   | CRC <i>vs</i> NL                    | Stool  | 76.50          | 96.40          | 0.939          |        |
|             | Zhu, 2016 [105]                 | 131 | China       | CRC <i>vs</i> NL                    | Stool  | 60.00          | 71.00          | 0.649          | 0.004  |
|             | Huang, 2010 [82]                | 196 | China       | -                                   | Plasma | -              | -              | -              | -      |
|             | Zheng, 2014 [104]               | 697 | China       | CRC <i>vs</i> H                     | Serum  | -              | -              | 0.890          | -      |
|             | Karimi, 2019 [41]               | 38  | Iran        | -                                   | Serum  | -              | -              | -              | -      |
|             | Choi, 2019 [27]                 | 58  | South Korea | -                                   | Stool  | -              | -              | -              | -      |
| miR-135b-5p | Phua, 2014 [44]                 | 45  | Singapore   | -                                   | Stool  | -              | -              | -              | -      |
|             | Wu, 2014 [57]                   | 424 | China       | CRC <i>vs</i> NL                    | Stool  | 78.00          | 68.00          | 0.790          | -      |
|             |                                 |     |             | AA <i>vs</i> NL                     |        | 73.00          | -              | 0.710          | -      |
|             |                                 |     |             | CRA <i>vs</i> NL                    |        | 61.00          | -              | -              | -      |
|             |                                 |     |             | CRP <i>vs</i> NL                    |        | 65.00          | -              | -              | -      |
|             | Koga, 2010 [67]                 | 340 | Japan       | CRC <i>vs</i> NL                    | Stool  | 45.70          | 95.00          | -              | -      |
|             | Karimi, 2019 [41]               | 38  | Iran        | -                                   | Serum  | -              | -              | -              | -      |

Table S1. Cont.

| MicroRNA    | Author, Year                     | N   | Country | Compared Groups    | Sample | SENS (%) | SPEC (%) | AUC   | p      |
|-------------|----------------------------------|-----|---------|--------------------|--------|----------|----------|-------|--------|
| miR-135b-5p | Li, 2020 [28]                    | 106 | China   | CRC <i>vs</i> H    | Serum  | 93.10    | 72.70    | 0.830 | -      |
|             |                                  |     |         |                    | Stool  | 96.50    | 74.10    | 0.870 | -      |
| miR-19a-3p  | Koga, 2010 [67]                  | 340 | Japan   | CRC <i>vs</i> NL   | Stool  | 53.30    | 89.10    | -     | -      |
|             | Herrerros-Villanueva, 2019 [123] | 297 | Spain   | -                  | Plasma | -        | -        | -     | -      |
|             | Yamada, 2015 [93]                | 188 | USA     | -                  | Serum  | -        | -        | -     | -      |
|             | Zheng, 2014 [104]                | 697 | China   | CRC <i>vs</i> H    | Serum  | -        | -        | 0.849 | -      |
|             | Dohmen, 2022 [91]                | 69  | Germany | CRC <i>vs</i> NL   | Serum  | -        | -        | 0.600 | -      |
|             | Maminezhad, 2020 [32]            | 90  | Iran    | CRC <i>vs</i> H    | Serum  | -        | -        | 0.870 | <0.001 |
| miR-221-3p  | Chang, 2016 [29]                 | 323 | Taiwan  | CRC <i>vs</i> NL   | Plasma | -        | -        | 0.743 | 0.000  |
|             | Yau, 2014 [106]                  | 595 | China   | CRC <i>vs</i> NL   | Stool  | 63.00    | 74.00    | 0.730 | -      |
|             | Duran, 2020 [20]                 | 767 | Spain   | AA <i>vs</i> NL    | Stool  | 70.00    | 51.00    | 0.620 | <0.05  |
|             | Huang, 2010 [82]                 | 196 | China   | -                  | Plasma | -        | -        | -     | -      |
|             | Karimi, 2019 [41]                | 38  | Iran    | -                  | Serum  | -        | -        | -     | -      |
|             | Shiosaki, 2020 [72]              | 91  | Japan   | -                  | Serum  | -        | -        | -     | -      |
| miR-143-5p  | Link, 2010 [56]                  | 38  | USA     | -                  | Stool  | -        | -        | -     | -      |
|             | Luo, 2013 [116]                  | 280 | Germany | -                  | Plasma | -        | -        | -     | -      |
|             | Huang, 2020 [69]                 | 270 | China   | CRC <i>vs</i> H    | Serum  | -        | -        | 0.745 | <0.001 |
|             | Karimi, 2019 [41]                | 38  | Iran    | -                  | Serum  | -        | -        | -     | -      |
|             | Maminezhad, 2020 [32]            | 90  | Iran    | CRC <i>vs</i> H    | Serum  | -        | -        | 0.760 | <0.001 |
|             | Wang, 2014 [122]                 | 202 | China   | -                  | Serum  | -        | -        | -     | -      |
| miR-31-5p   | Chang, 2016 [29]                 | 323 | Taiwan  | CRC <i>vs</i> NL   | Plasma | -        | -        | 0.559 | 0.092  |
|             | Wu, C, 2014 [57]                 | 424 | China   | -                  | Stool  | -        | -        | -     | -      |
|             | Karimi, 2019 [41]                | 38  | Iran    | -                  | Serum  | -        | -        | -     | -      |
|             | Liu, 2018 [92]                   | 150 | China   | -                  | Plasma | -        | -        | -     | -      |
|             | Toiyama, 2013 [75]               | 279 | Japan   | -                  | Serum  | -        | -        | -     | -      |
|             | Wang, 2014 [122]                 | 202 | China   | -                  | Serum  | -        | -        | -     | -      |
| miR-145-5p  | Zhu, 2016 [105]                  | 131 | China   | -                  | Stool  | -        | -        | -     | -      |
|             | Luo, 2013 [116]                  | 280 | Germany | -                  | Plasma | -        | -        | -     | -      |
|             | Huang, 2020 [69]                 | 270 | China   | CRC <i>vs</i> H    | Serum  | -        | -        | 0.754 | <0.001 |
|             | Maminezhad, 2020 [32]            | 90  | Iran    | CRC <i>vs</i> H    | Serum  | -        | -        | 0.780 | <0.001 |
|             | Wang, 2014 [122]                 | 202 | China   | -                  | Serum  | -        | -        | -     | -      |
| miR-27a-3p  | Duran-Sanchon, 2020 [20]         | 767 | Spain   | AA <i>vs</i> NL    | Stool  | 69.00    | 52.00    | 0.623 | <0.05  |
|             | Liu, 2018 [97]                   | 369 | China   | CRC <i>vs</i> H    | Plasma | 81.82    | 90.91    | 0.866 | -      |
|             |                                  |     |         | CRC-I <i>vs</i> H  |        | 75.00    | 77.50    | 0.773 | -      |
|             |                                  |     |         | CRC-I <i>vs</i> AA |        | 80.00    | 77.50    | 0.746 | -      |
|             | Farouk, 2020 [74]                | 70  | Egypt   | CRC <i>vs</i> H    | Serum  | 42.86    | 88.57    | 0.665 | 0.024  |
| miR-23a-3p  | Farouk, 2020 [74]                | 70  | Egypt   | CRC <i>vs</i> H    | Serum  | 82.86    | 91.34    | 0.887 | <0.001 |

Table S1. Cont.

| MicroRNA    | Author, Year             | N   | Country     | Compared Groups   | Sample | SENS (%) | SPEC (%) | AUC   | p      |
|-------------|--------------------------|-----|-------------|-------------------|--------|----------|----------|-------|--------|
| miR-23a-3p  | Dohmen, 2022 [91]        | 69  | Germany     | CRC <i>vs</i> NL  | Serum  | -        | -        | 0.670 | -      |
|             | Karimi, 2019 [41]        | 38  | Iran        | CRC <i>vs</i> NL  | Serum  | -        | -        | 0.890 | -      |
|             | Shi, 2021 [98]           | 135 | China       | CRC-I <i>vs</i> H | Serum  | 89.91    | 74.29    | 0.850 | -      |
|             |                          |     |             | CRC <i>vs</i> H   | Serum  | 91.00    | 74.29    | 0.890 | -      |
| miR-17-5p   | Koga, 2010 [67]          | 340 | Japan       | CRC <i>vs</i> NL  | Stool  | 15.70    | 89.10    | -     | -      |
|             | Link, 2010 [56]          | 38  | USA         | -                 | Stool  | -        | -        | -     | -      |
|             | Zhang, 2019 [95]         | 271 | China       | CRC <i>vs</i> H   | Plasma | -        | -        | 0.742 | -      |
|             | Wang, 2014 [122]         | 202 | China       | -                 | Serum  | -        | -        | -     | -      |
| miR-25-3p   | Chang, 2016 [29]         | 323 | Taiwan      | CRC <i>vs</i> NL  | Plasma | -        | -        | 0.642 | 0.000  |
|             | Link, 2010 [56]          | 38  | USA         | -                 | Stool  | -        | -        | -     | -      |
|             | Duran-Sanchon, 2020 [20] | 767 | Spain       | AA <i>vs</i> NL   | Stool  | 72.00    | 47.00    | 0.620 | <0.05  |
|             | Huang, 2010 [82]         | 196 | China       | -                 | Plasma | -        | -        | -     | -      |
| miR-1290    | Imaoka, 2016 [45]        | 324 | Japan       | CRC <i>vs</i> H   | Serum  | 70.10    | 91.20    | 0.830 | -      |
|             |                          |     |             | AA <i>vs</i> H    |        | 46.40    | 91.20    | 0.718 | -      |
|             | Liu, 2019 [114]          | 205 | China       | CRC <i>vs</i> NL  | Plasma | 75.53    | 87.41    | 0.780 | -      |
|             |                          |     |             | CRA <i>vs</i> NL  | Plasma | 76.65    | 90.23    | 0.880 | -      |
|             | Shi, 2021 [98]           | 135 | China       | CRC-I <i>vs</i> H | Serum  | 83.33    | 85.71    | 0.890 | -      |
|             |                          |     |             | CRC <i>vs</i> H   | Serum  | 85.00    | 88.57    | 0.920 | -      |
| miR-146a-5p | Liu, 2016 [73]           | 270 | China       | CRC <i>vs</i> NL  | Stool  | 77.20    | 68.10    | 0.794 | -      |
|             |                          |     |             | CRA <i>vs</i> NL  |        | 77.50    | 66.70    | 0.698 | -      |
|             | Bader El din, 2020 [66]  | 129 | Egypt       | CRC <i>vs</i> NL  | Serum  | 98.00    | 74.10    | 0.805 | -      |
|             | Huang, 2010 [82]         | 196 | China       | -                 | Plasma | -        | -        | -     | -      |
| miR-34a-5p  | Duran, 2020 [20]         | 767 | Spain       | AA <i>vs</i> NL   | Stool  | 71.00    | 49.00    | 0.620 | <0.05  |
|             | Wu, 2014 [118]           | 122 | China       | CRC <i>vs</i> H   | Stool  | 76.80    | 93.60    | -     | -      |
|             | Dohmen, 2022 [91]        | 69  | Germany     | CRC <i>vs</i> NL  | Serum  | -        | -        | 0.550 | -      |
| miR-24-3p   | Chang, 2016 [29]         | 323 | Taiwan      | CRC <i>vs</i> NL  | Plasma | -        | -        | 0.753 | 0.000  |
|             | Fang, 2015 [70]          | 353 | China       | CRC <i>vs</i> H   | Plasma | 78.38    | 83.85    | 0.839 | -      |
|             | Yamada, 2015 [93]        | 188 | USA         | -                 | Serum  | -        | -        | -     | -      |
| miR-424-5p  | Tan, 2019 [96]           | 255 | China       | CRC <i>vs</i> H   | Plasma | 79.20    | 93.60    | 0.919 | <0.05  |
|             | Liu, 2018 [92]           | 150 | China       | -                 | Plasma | -        | -        | -     | -      |
|             | Yamada, 2015 [93]        | 188 | USA         | -                 | Serum  | -        | -        | -     | -      |
| miR-106a-5p | Choi, 2019 [27]          | 58  | South Korea | -                 | Stool  | -        | -        | -     | -      |
|             | Koga, 2013 [55]          | 224 | Japan       | CRC <i>vs</i> NL  | Stool  | 34.20    | 97.20    | -     | -      |
|             | Link, 2010 [56]          | 38  | USA         | -                 | Stool  | -        | -        | -     | -      |
| miR-106b-5p | Chang, 2016 [29]         | 323 | Taiwan      | CRC <i>vs</i> NL  | Stool  | -        | -        | 0.705 | 0.000  |
|             | Huang, 2020 [69]         | 270 | China       | CRC <i>vs</i> H   | Serum  | -        | -        | 0.624 | <0.001 |
|             | Luo, 2013 [116]          | 280 | Germany     | -                 | Plasma | -        | -        | -     | -      |
| miR-200c-3p | Choi, 2019 [27]          | 58  | South Korea | -                 | Stool  | -        | -        | -     | -      |
|             | Zhang, 2013 [94]         | 164 | China       | CRC <i>vs</i> NL  | Plasma | 64.10    | 73.30    | 0.749 | 0.021  |

Table S1. Cont.

| MicroRNA    | Author, Year                    | N   | Country     | Compared Groups                                           | Sample | SENS (%)                | SPEC (%)                | AUC                     | p                          |
|-------------|---------------------------------|-----|-------------|-----------------------------------------------------------|--------|-------------------------|-------------------------|-------------------------|----------------------------|
| miR-200c-3p | Huang, 2020 [69]                | 270 | China       | CRC <i>vs</i> H                                           | Serum  | -                       | -                       | 0.656                   | <0.05                      |
|             | Koga, 10 [67]                   | 340 | Japan       | CRC <i>vs</i> NL                                          | Stool  | 15.70                   | 90.80                   | -                       | -                          |
| miR-19b-3p  | Herreros-Villanueva, 2019 [123] | 297 | Spain       | -                                                         | Plasma | -                       | -                       | -                       | -                          |
|             | Yamada, 2015 [93]               | 188 | USA         | -                                                         | Serum  | -                       | -                       | -                       | -                          |
| miR-16-5p   | Chang, 2016 [29]                | 323 | Taiwan      | CRC <i>vs</i> NL                                          | Stool  | -                       | -                       | 0.703                   | 0.000                      |
|             | Wang, 2014 [122]                | 202 | China       | -                                                         | Serum  | -                       | -                       | -                       | -                          |
|             | Dohmen, 2022 [91]               | 69  | Germany     | CRC <i>vs</i> NL                                          | Serum  | -                       | -                       | 0.670                   | -                          |
| miR-181b-5p | Huang, 2010 [82]                | 196 | China       | -                                                         | Plasma | -                       | -                       | -                       | -                          |
|             | Wang, 2014 [122]                | 202 | China       | -                                                         | Serum  | -                       | -                       | -                       | -                          |
|             | Luo, 2013 [116]                 | 280 | Germany     | -                                                         | Plasma | -                       | -                       | -                       | -                          |
| miR-144-5p  | Choi, 2019 [27]                 | 58  | South Korea | CRC <i>vs</i> NL                                          | Stool  | 78.90                   | 66.70                   | 0.770                   | -                          |
|             | Kalimutho, 2011 [30]            | 75  | Italy       | CRC <i>vs</i> NL                                          | Stool  | 74.29                   | 87.20                   | 0.829                   | -                          |
| miR-let-7c  | Bader El din, 2020 [66]         | 129 | Egypt       | CRC <i>vs</i> NL                                          | Serum  | 77.60                   | 96.20                   | 0.855                   | -                          |
|             | Dohmen, 2022 [91]               | 69  | Germany     | CRC <i>vs</i> NL                                          | Serum  | -                       | -                       | 0.640                   | -                          |
| miR-103a-3p | Nonaka, 2015 [65]               | 146 | Japan       | CRC <i>vs</i> H                                           | Serum  | 75.00                   | 55.90                   | 0.662                   | -                          |
|             | Zhang, 2019 [95]                | 271 | China       | CRC <i>vs</i> H                                           | Plasma | -                       | -                       | 0.756                   | -                          |
| miR-601     | Wang, 2012 [115]                | 191 | China       | CRC <i>vs</i> H<br>AA <i>vs</i> H                         | Plasma | 62.20<br>72.10          | 72.40<br>51.70          | 0.747<br>0.638          | 0.002<br>0.0174            |
|             | Yamada, 2015 [93]               | 188 | USA         | -                                                         | Serum  | -                       | -                       | -                       | -                          |
| miR-760     | Wang, 2012 [115]                | 191 | China       | CRC <i>vs</i> H<br>AA <i>vs</i> H                         | Plasma | 80.00<br>69.80          | 72.40<br>62.10          | 0.788<br>0.682          | <0.001<br>0.0214           |
|             | Yamada, 2015 [93]               | 188 | USA         | -                                                         | Serum  | -                       | -                       | -                       | -                          |
| miR-592     | Liu, 2018 [92]                  | 150 | China       | -                                                         | Plasma | -                       | -                       | -                       | -                          |
|             | Pan, 2020 [34]                  | 246 | China       | CRC <i>vs</i> NL<br>CRC-I <i>vs</i> NL<br>AA <i>vs</i> NL | Serum  | 82.80<br>78.60<br>68.60 | 78.00<br>80.00<br>78.10 | 0.844<br>0.801<br>0.747 | <0.001<br><0.001<br><0.001 |
| miR-451     | Phua, 2014 [44]                 | 45  | Singapore   | CRC <i>vs</i> NL                                          | Stool  | 88.20                   | 100.00                  | 0.971                   | -                          |
|             | Dohmen, 2022 [91]               | 69  | Germany     | CRC <i>vs</i> NL                                          | Serum  | -                       | -                       | 0.650                   | -                          |
| miR-335-3p  | Duran-Sanchon, 2020 [20]        | 767 | Spain       | AA <i>vs</i> NL                                           | Stool  | 74.00                   | 45.00                   | 0.620                   | <0.05                      |
|             | Herreros-Villanueva, 2019 [123] | 297 | Spain       | -                                                         | Plasma | -                       | -                       | -                       | -                          |
| miR-622     | Link, 2010 [56]                 | 38  | USA         | -                                                         | Stool  | -                       | -                       | -                       | -                          |
|             | Ng, 2017 [68]                   | 207 | China       | CRC <i>vs</i> NL                                          | Serum  | 87.80                   | 63.50                   | -                       | -                          |
| miR-18b-5p  | Karimi, 2019 [41]               | 38  | Iran        | -                                                         | Serum  | -                       | -                       | -                       | -                          |
|             | Zhang, 2019 [95]                | 271 | China       | CRC <i>vs</i> H                                           | Plasma | -                       | -                       | 0.781                   | -                          |
| miR-320a-3p | Huang, 2010 [82]                | 196 | China       | -                                                         | Plasma | -                       | -                       | -                       | -                          |
|             | Fang, 2015 [70]                 | 353 | China       | CRC <i>vs</i> H                                           | Plasma | 92.74                   | 73.08                   | 0.886                   | -                          |
| miR-191-5p  | Chang, 2016 [29]                | 323 | Taiwan      | CRC <i>vs</i> NL                                          | Plasma | -                       | -                       | 0.714                   | 0.000                      |
|             | Huang, 2010 [82]                | 196 | China       | -                                                         | Plasma | -                       | -                       | -                       | -                          |
| miR-203a-5p | Wang, 2014 [122]                | 202 | China       | -                                                         | Serum  | -                       | -                       | -                       | -                          |

Table S1. Cont.

| MicroRNA    | Author, Year             | N   | Country     | Compared Groups   | Sample | SENS (%) | SPEC (%) | AUC   | p      |
|-------------|--------------------------|-----|-------------|-------------------|--------|----------|----------|-------|--------|
| miR-203a-5p | Huang, 2020 [69]         | 270 | China       | CRC <i>vs</i> H   | Serum  | -        | -        | 0.713 | <0.001 |
| miR-17-3p   | Choi, 2019 [27]          | 58  | South Korea | CRC <i>vs</i> NL  | Stool  | 70.80    | 67.90    | 0.710 | -      |
|             | Huang, 2010 [82]         | 196 | China       | -                 | Plasma | -        | -        | -     | -      |
| miR-135a-5p | Choi, 2019 [27]          | 58  | South Korea | -                 | Stool  | -        | -        | -     | -      |
|             | Koga, 2010 [67]          | 340 | Japan       | CRC <i>vs</i> H   | Stool  | 15.20    | 100.00   | -     | -      |
| miR-378a-3p | Kalimutho, 2011 [30]     | 75  | Italy       | -                 | Stool  | -        | -        | -     | -      |
|             | Liu, 2018 [92]           | 150 | China       | -                 | Plasma | -        | -        | -     | -      |
| miR-222-3p  | Huang, 2010 [82]         | 196 | China       | -                 | Plasma | -        | -        | -     | -      |
|             | Dohmen, 2022 [91]        | 69  | Germany     | CRC <i>vs</i> NL  | Serum  | -        | -        | 0.630 | -      |
| miR-133a-5p | Liu, 2018 [92]           | 150 | China       | -                 | Plasma | -        | -        | -     | -      |
|             | Luo, 2013 [116]          | 280 | Germany     | -                 | Plasma | -        | -        | -     | -      |
| miR-532-3p  | Luo, 2013 [116]          | 280 | Germany     | -                 | Plasma | -        | -        | -     | -      |
|             | Kalimutho, 2011 [30]     | 75  | Italy       | -                 | Stool  | -        | -        | -     | -      |
| miR-139-3p  | Ng, 2017 [68]            | 207 | China       | CRC <i>vs</i> NL  | Serum  | 96.60    | 97.80    | 0.994 | -      |
| miR-4516    | Jin, 2020 [61]           | 195 | China       | CRC <i>vs</i> NL  | Serum  | 94.40    | 89.80    | 0.958 | <0.05  |
| miR-144-3p  | Tan, 2019 [96]           | 255 | China       | CRC <i>vs</i> H   | Plasma | 93.80    | 78.70    | 0.887 | <0.05  |
| miR-199a-5p | Zhao, 2022 [113]         | 233 | China       | CRC <i>vs</i> H   | Serum  | 93.00    | 70.00    | 0.900 | <0.001 |
|             |                          |     |             | AA <i>vs</i> H    |        | 90.00    | 53.00    | 0.760 | <0.001 |
|             |                          |     |             | CRC <i>vs</i> AA  |        | 81.00    | 70.00    | 0.830 | <0.001 |
| miR-423-5p  | Fang, 2015 [70]          | 353 | China       | CRC <i>vs</i> H   | Plasma | 91.89    | 70.77    | 0.833 | -      |
| miR-940     | Shi, 2021 [98]           | 135 | China       | CRC-I <i>vs</i> H | Serum  | 90.00    | 71.43    | 0.830 | -      |
|             |                          |     |             | CRC <i>vs</i> H   | Serum  | 90.00    | 77.14    | 0.880 | -      |
| miR-320d    | Liu, 2019 [114]          | 205 | China       | CRC <i>vs</i> NL  | Plasma | 88.83    | 71.66    | 0.740 | -      |
|             |                          |     |             | CRA <i>vs</i> NL  | Plasma | 79.64    | 71.55    | 0.810 | -      |
| miR-196b    | Xu, 2017 [21]            | 254 | China       | CRC <i>vs</i> H   | Serum  | 87.38    | 63.00    | 0.814 | -      |
| miR-627-5p  | Zhao, 2022 [113]         | 233 | China       | CRC <i>vs</i> H   | Serum  | 87.00    | 100.00   | 0.970 | <0.001 |
|             |                          |     |             | AA <i>vs</i> H    |        | 62.00    | 93.00    | 0.840 | <0.001 |
|             |                          |     |             | CRC <i>vs</i> AA  |        | 71.00    | 93.00    | 0.900 | <0.001 |
| miR-126-3p  | Shi, 2021 [98]           | 135 | China       | CRC <i>vs</i> H   | Serum  | 84.00    | 88.57    | 0.900 | -      |
|             |                          |     |             | CRC-I <i>vs</i> H | Serum  | 86.67    | 77.14    | 0.940 | -      |
| miR-425-5p  | Tan, 2019 [96]           | 255 | China       | CRC <i>vs</i> H   | Plasma | 83.30    | 91.50    | 0.910 | <0.05  |
| miR-130b-3p | Duran-Sanchon, 2020 [20] | 767 | Spain       | AA <i>vs</i> NL   | Stool  | 82.00    | 39.00    | 0.640 | <0.05  |
| miR-1260b   | Tan, 2019 [96]           | 255 | China       | CRC <i>vs</i> H   | Plasma | 81.30    | 83.30    | 0.848 | <0.05  |
| miR-421     | Duran-Sanchon, 2020 [20] | 767 | Spain       | AA <i>vs</i> NL   | Stool  | 81.00    | 43.00    | 0.680 | <0.05  |
| miR-148a-3p | Tan, 2019 [96]           | 255 | China       | CRC <i>vs</i> H   | Plasma | 79.20    | 91.50    | 0.871 | <0.05  |
| miR-182-5p  | Liu, 2018 [92]           | 150 | China       | CRC <i>vs</i> NL  | Plasma | 78.00    | 91.00    | 0.801 | -      |
| miR-26a-5p  | Bader El din, 2020 [66]  | 129 | Egypt       | CRC <i>vs</i> NL  | Serum  | 77.60    | 96.20    | 0.918 | -      |
| miR-506-3p  | Krawczyk, 2017 [64]      | 126 | Poland      | CRC <i>vs</i> H   | Plasma | 76.80    | 60.70    | 0.747 | -      |
| miR-338-5p  | Bilegsaikhan, 2018 [63]  | 210 | China       | CRC <i>vs</i> NL  | Serum  | 76.30    | 92.50    | 0.923 | -      |

Table S1. Cont.

| MicroRNA      | Author, Year          | N   | Country | Compared Groups   | Sample | SENS (%) | SPEC (%) | AUC   | p      |
|---------------|-----------------------|-----|---------|-------------------|--------|----------|----------|-------|--------|
| miR-224-5p    | Zhu, 2016 [105]       | 131 | China   | CRC <i>vs</i> NL  | Stool  | 75.00    | 63.00    | 0.774 | <0.001 |
| miR-143-3p    | Tan, 2019 [96]        | 255 | China   | CRC <i>vs</i> H   | Plasma | 72.90    | 78.70    | 0.777 | <0.05  |
| miR-130a-3p   | Liu, 2018 [97]        | 369 | China   | CRC <i>vs</i> H   | Plasma | 69.32    | 100.00   | 0.816 | -      |
|               |                       |     |         | CRC-I <i>vs</i> H |        | 82.50    | 62.50    | 0.742 | -      |
|               |                       |     |         | CRC <i>vs</i> AA  |        | 70.00    | 80.00    | 0.697 | -      |
| miR-4316      | Krawczyk, 2017 [64]   | 126 | Poland  | CRC <i>vs</i> H   | Plasma | 60.90    | 83.90    | 0.744 | -      |
| miR-720       | Nonaka, 2015 [65]     | 146 | Japan   | CRC <i>vs</i> H   | Serum  | 58.30    | 56.30    | 0.630 | -      |
| miR-422a      | Zheng, 2014 [104]     | 697 | China   | CRC <i>vs</i> H   | Serum  | -        | -        | 0.843 | -      |
| miR-301a-3p   | Karimi, 2019 [41]     | 38  | Iran    | CRC <i>vs</i> NL  | Serum  | -        | -        | 0.840 | -      |
| miR-125b-5p   | Yamada, 2015 [93]     | 188 | USA     | CRC <i>vs</i> NL  | Serum  | -        | -        | 0.806 | -      |
| miR-150-5p    | Maminezhad, 2020 [32] | 90  | Iran    | CRC <i>vs</i> H   | Serum  | -        | -        | 0.750 | <0.001 |
| miR-151a-5p   | Zhang, 2019 [95]      | 271 | China   | CRC <i>vs</i> H   | Plasma | -        | -        | 0.737 | -      |
| miR-181a-5p   | Zhang, 2019 [95]      | 271 | China   | CRC <i>vs</i> H   | Plasma | -        | -        | 0.736 | -      |
| miR-127-3p    | Zhang, 2019 [95]      | 271 | China   | CRC <i>vs</i> H   | Plasma | -        | -        | 0.729 | -      |
| miR-375-3p    | Huang, 2020 [69]      | 270 | China   | CRC <i>vs</i> H   | Serum  | -        | -        | 0.715 | <0.001 |
| miR-let-7a-3p | Maminezhad, 2020 [32] | 90  | Iran    | CRC <i>vs</i> H   | Serum  | -        | -        | 0.710 | 0.0048 |
| miR-200c-5p   | Huang, 2020 [69]      | 270 | China   | CRC <i>vs</i> H   | Serum  | -        | -        | 0.702 | <0.001 |
| miR-10b       | Chang, 2016 [29]      | 323 | Taiwan  | CRC <i>vs</i> NL  | Plasma | -        | -        | 0.645 | 0.000  |
| miR-141-3p    | Chang, 2016 [29]      | 323 | Taiwan  | CRC <i>vs</i> NL  | Plasma | -        | -        | 0.581 | 0.021  |
| miR-497-5p    | Chang, 2016 [29]      | 323 | Taiwan  | CRC <i>vs</i> NL  | Plasma | -        | -        | 0.576 | 0.031  |
| miR-145-3p    | Huang, 2020 [69]      | 270 | China   | CRC <i>vs</i> H   | Serum  | -        | -        | 0.525 | <0.05  |
| miR-29b-3p    | Link, 2010 [56]       | 38  | USA     | -                 | Stool  | -        | -        | -     | -      |
| miR-654-3p    | Link, 2010 [56]       | 38  | USA     | -                 | Stool  | -        | -        | -     | -      |
| miR-1238-3p   | Link, 2010 [56]       | 38  | USA     | -                 | Stool  | -        | -        | -     | -      |
| miR-938       | Link, 2010 [56]       | 38  | USA     | -                 | Stool  | -        | -        | -     | -      |
| miR-576-3p    | Eldaly, 2020 [22]     | 28  | Egypt   | -                 | Serum  | -        | -        | -     | -      |
| miR-613       | Eldaly, 2020 [22]     | 28  | Egypt   | -                 | Serum  | -        | -        | -     | -      |
| miR-134-5p    | Huang, 2010 [82]      | 196 | China   | -                 | Plasma | -        | -        | -     | -      |
| miR-142       | Karimi, 2019 [41]     | 38  | Iran    | -                 | Serum  | -        | -        | -     | -      |
| miR-675-5p    | Liu, 2018 [92]        | 150 | China   | -                 | Plasma | -        | -        | -     | -      |
| miR-875-3p    | Liu, 2019 [114]       | 205 | China   | -                 | Plasma | -        | -        | -     | -      |
| miR-490-5p    | Liu, 2019 [114]       | 205 | China   | -                 | Plasma | -        | -        | -     | -      |
| miR-1266      | Liu, 2019 [114]       | 205 | China   | -                 | Plasma | -        | -        | -     | -      |
| miR-615-3p    | Liu, 2019 [114]       | 205 | China   | -                 | Plasma | -        | -        | -     | -      |
| miR-let-7g-5p | Wang, 2014 [122]      | 202 | China   | -                 | Serum  | -        | -        | -     | -      |
| miR-30c-5p    | Wang, 2014 [122]      | 202 | China   | -                 | Serum  | -        | -        | -     | -      |
| miR-409-3p    | Yamada, 2015 [93]     | 188 | USA     | -                 | Serum  | -        | -        | -     | -      |
| miR-575       | Yamada, 2015 [93]     | 188 | USA     | -                 | Serum  | -        | -        | -     | -      |
| mir-342-3p    | Luo, 2013 [116]       | 280 | Germany | -                 | Plasma | -        | -        | -     | -      |

**Table S1.** Cont.

| MicroRNA   | Author, Year                    | N   | Country | Compared Groups | Sample | SENS (%) | SPEC (%) | AUC | p |
|------------|---------------------------------|-----|---------|-----------------|--------|----------|----------|-----|---|
| miR-15b-5p | Herreros-Villanueva, 2019 [123] | 297 | Spain   | -               | Plasma | -        | -        | -   | - |

Abbreviation: miR: microRNA; NL: No Lesion; CRP: Colorectal polyps; CRA: Colorectal Adenoma; AA: Advanced Adenoma; CRC: Colorectal Cancer; CRC-I: CRC in stage I; CRC-II: CRC in stage II; CRC-III: CRC in stage III; CRC-IV: CRC in stage IV; CRC-I-II: CRC in stage I or II; CRC-III-IV: CRC in stage III or IV; AUC: Area under the curve; p: p asymptotic.



**Table S2.** Performance of microRNAs combinations described in the context CRC screening both in stool and blood samples.

| MicroRNAs combinations                                                                               | Author, year                    | N   | Country   | Compared Groups          | Sample           | SEN/SPE (%)   | AUC   | p      |
|------------------------------------------------------------------------------------------------------|---------------------------------|-----|-----------|--------------------------|------------------|---------------|-------|--------|
| miR-223-3p + miR-92a-3p                                                                              | Chang, 2016 [29]                | 323 | Taiwan    | CRC <i>vs</i> NL         | Stool and Plasma | 96.80/ 75.00  | 0.910 | -      |
| miR-21-5p + miR-23a-3p + miR-27a-3p                                                                  | Farouk, 2020 [74]               | 70  | Egypt     | CRC <i>vs</i> H          | Serum            | 97.14/ 82.86  | 0.908 | <0.001 |
| miR-21-5p + miR-23a-3p                                                                               | Farouk, 2020 [74]               | 70  | Egypt     | CRC <i>vs</i> H          | Serum            | 97.14/ 82.86  | 0.905 | <0.001 |
| miR-144-3p + miR-425-5p + miR-1260b                                                                  | Tan, 2019 [96]                  | 255 | China     | CRC <i>vs</i> H          | Plasma           | 93.80/ 91.30  | 0.954 | <0.05  |
| miR-331-3p + miR-15b-5p + miR-25-5p                                                                  | Kanaan, 2013 [62]               | 128 | USA       | CRC <i>vs</i> NL         | Plasma           | 93.00/ 74.00  | -     | -      |
| miR-4516 + miR-21-5p                                                                                 | Jin, 2020 [61]                  | 195 | China     | CRC <i>vs</i> NL         | Serum            | 92.11/ 87.60  | 0.943 | <0.001 |
| miR-21-5p + miR-26a-5p                                                                               | Bader El Din, 2020 [66]         | 129 | Egypt     | CRC <i>vs</i> NL         | Serum            | 91.80/ 91.70  | -     | -      |
| miR-331-3p + miR-15b-5p + miR-21-5p + miR-142-3p + miR-339-3p                                        | Kanaan, 2013 [62]               | 128 | USA       | CRC <i>vs</i> AA         | Plasma           | 91.00/ 69.00  | 0.856 | -      |
| miR-431-5p + miR-139-3p                                                                              | Kanaan, 2013 [62]               | 128 | USA       | CRC <i>vs</i> NL         | Plasma           | 91.00/ 57.00  | 0.829 | -      |
| miR-19a-3p + miR-19b-3p + miR-15b-5p + miR-29a-3p + miR-335-3p + miR-18a-5p                          | Herreros-Villanueva, 2019 [123] | 297 | Spain     | CRC <i>vs</i> NL         | Plasma           | 91.00/ 90.00  | 0.949 | -      |
|                                                                                                      |                                 |     |           | AA <i>vs</i> H           |                  | 95.00/ 90.00  | 0.914 | -      |
|                                                                                                      |                                 |     |           | (CRC; AA) <i>vs</i> H    |                  | 85.00/ 90.00  | 0.916 | -      |
|                                                                                                      |                                 |     |           | CRC-I <i>vs</i> H        |                  | 90.00/ 80.00  | 0.920 | <0.001 |
| miR-513a-5p + miR-628-3p + miR-193a-5p + miR-210-3p                                                  | Nakamura, 2022 [121]            | 349 | Barcelona | CRC-I <i>vs</i> CRC-II   | Plasma           | 92.00/ 80.00  | 0.920 | <0.001 |
|                                                                                                      |                                 |     |           | CRC-III <i>vs</i> CRC-IV |                  | 79.00/ 86.00  | 0.870 | <0.001 |
|                                                                                                      |                                 |     |           | CRC III-IV <i>vs</i> H   |                  | 82.00/ 88.00  | 0.840 | <0.001 |
| miR-126-3p + miR-1290 + miR-23a-3p + miR-940                                                         | Shi, 2021 [98]                  | 135 | China     | CRC-I <i>vs</i> H        | Serum            | 90.00/ 82.86  | 0.920 | -      |
| miR-126-3p + miR-1290 + miR-23a-3p + miR-940                                                         | Shi, 2021 [98]                  | 135 | China     | CRC <i>vs</i> H          | Serum            | 90.00/ 88.57  | 0.950 | -      |
| miR-532-3p + miR-331-3p + miR-195-5p + miR-17-5p + miR-142-3p + miR-15b-5p + miR-532-3p + miR-652-3p | Kanaan, 2013 [62]               | 128 | USA       | CRC <i>vs</i> NL         | Plasma           | 88.00/ 64.00  | 0.868 | -      |
| miR-627-5p + miR-199a-5p                                                                             | Zhao, 2022 [113]                | 233 | China     | CRC <i>vs</i> H          | Serum            | 87.10/ 100.00 | 0.980 | <0.001 |
|                                                                                                      |                                 |     |           | AA <i>vs</i> H           |                  | 78.00/ 70.00  | 0.860 | <0.001 |
|                                                                                                      |                                 |     |           | CRC <i>vs</i> AA         |                  | 83.00/ 87.00  | 0.920 | <0.001 |
| miR-21-5p + miR-27a-3p                                                                               | Farouk, 2020 [74]               | 70  | Egypt     | CRC <i>vs</i> H          | Serum            | 85.71/ 88.57  | 0.899 | <0.001 |
| miR-27a-3p + miR-130a-3p                                                                             | Liu, 2018 [97]                  | 369 | China     | CRC <i>vs</i> H          | Plasma           | 85.23/ 90.91  | 0.899 | -      |
|                                                                                                      |                                 |     |           | CRC-I <i>vs</i> H        | Plasma           | 82.50/ 75.00  | 0.846 | -      |
|                                                                                                      |                                 |     |           | AA <i>vs</i> H           | Plasma           | 80.00/ 90.00  | 0.801 | -      |
| miR-200c-5p + miR-18a-5p                                                                             | Zhang, 2013 [104]               | 164 | China     | CRC <i>vs</i> NL         | Plasma           | 84.60/ 75.60  | 0.839 | -      |
| let-7c + miR-146a-5p                                                                                 | Bader El Din, 2020 [66]         | 129 | Egypt     | CRC <i>vs</i> NL         | Serum            | 84.50/ 88.00  | -     | -      |

Table S2. Cont.

| MicroRNAs combinations                                                                                                                                      | Author, year            | N   | Country | Compared Groups   | Sample | SEN/SPE (%)   | AUC   | p      |
|-------------------------------------------------------------------------------------------------------------------------------------------------------------|-------------------------|-----|---------|-------------------|--------|---------------|-------|--------|
| miR-92a-3p + miR-223-3p + miR-19a-3p + miR-422a                                                                                                             | Zheng, 2014 [104]       | 697 | China   | CRC <i>vs</i> H   | Serum  | 84.30/ 91.60  | 0.951 | <0.001 |
|                                                                                                                                                             |                         |     |         | CRC <i>vs</i> CRA |        | -/-           | 0.886 | -      |
|                                                                                                                                                             |                         |     |         | CRA <i>vs</i> H   |        | -/-           | 0.705 | -      |
| miR-21-5p + let-7g-5p + miR-92a-3p + miR-181b-5p + miR-31-5p + miR-203a-3p                                                                                  | Wang, 2014 [122]        | 202 | China   | CRC <i>vs</i> H   | Serum  | 83.30/ 96.70  | 0.923 | -      |
| miR-29a-5p + miR-92a-3p + miR-760                                                                                                                           | Wang, 2012 [115]        | 191 | China   | CRC <i>vs</i> H   | Plasma | 83.30/ 93.10  | 0.943 | -      |
| miR-601 + miR-760                                                                                                                                           | Wang, 2012 [115]        | 191 | China   | CRC <i>vs</i> H   | Plasma | 83.30/ 69.10  | 0.792 | -      |
|                                                                                                                                                             |                         |     |         | AA <i>vs</i> H    | Plasma | 72.10/ 62.10  | 0.683 | -      |
| let-7c + miR-146a-5p + miR-21-5p + miR-26a-5p                                                                                                               | Bader El Din, 2020 [66] | 129 | Egypt   | CRC <i>vs</i> NL  | Serum  | 82.10/ 100.00 | 0.953 | 0.001  |
| miR-203a-3p + miR-145-5p + miR-375-3p + miR-200c-5p                                                                                                         | Huang, 2020 [69]        | 270 | China   | CRC <i>vs</i> H   | Serum  | 81.25/73.33   | 0.893 | -      |
| miR-1290 + miR-320d                                                                                                                                         | Liu, 2019 [114]         | 150 | China   | CRC <i>vs</i> NL  | Plasma | 81.21/ 90.74  | 0.910 | -      |
|                                                                                                                                                             |                         |     |         | AA <i>vs</i> NL   | Plasma | 77.46/ 88.69  | 0.820 | -      |
| miR-18a-5p + miR-92a-3p + miR-221-3p + miR-223-3p + miR-191-5p + miR-24-3p                                                                                  | Chang, 2016 [29]        | 323 | Taiwan  | CRC <i>vs</i> NL  | Plasma | 76.30/ 68.80  | 0.790 | -      |
| miR-223-3p + miR-92a-3p                                                                                                                                     | Chang, 2016 [29]        | 323 | Taiwan  | CRC <i>vs</i> NL  | Plasma | 75.80/ 70.50  | 0.780 | -      |
| miR-92a-3p + miR-29a-3p                                                                                                                                     | Huang, 2010 [82]        | 196 | China   | CRC <i>vs</i> NL  | Plasma | 83.00/ 84.70  | 0.883 | <0.001 |
|                                                                                                                                                             |                         |     |         | AA <i>vs</i> NL   |        | 73.00/ 79.70  | 0.773 | <0.001 |
| miR-24 + miR-320a + miR-423-5p                                                                                                                              | Fang, 2015 [70]         | 353 | China   | CRC <i>vs</i> H   | Plasma | 70.77/ 92.79  | 0.899 | -      |
| miR-21-5p + miR-92a-3p                                                                                                                                      | Liu, 2013 [83]          | 340 | China   | CRC <i>vs</i> H   | Serum  | 68.00/91.20   | 0.847 | -      |
|                                                                                                                                                             |                         |     |         | CRC <i>vs</i> AA  |        | 70.00/70.00   | 0.722 | -      |
| miR-654-5p + miR-126-3p + miR-10b + miR-144-3p                                                                                                              | Du, 2022 [120]          | 220 | China   | CRC <i>vs</i> H   | Serum  | -/-           | 0.913 | <0.05  |
| miR-20a-5p + miR-182-5p                                                                                                                                     | Liu, 2018 [92]          | 150 | China   | CRC <i>vs</i> NL  | Serum  | -/-           | 0.905 | -      |
| let-7c + miR-16-5p + miR-21-5p + miR-23a-3p + miR-29a-3p + miR-34a-5p + miR-92a-3p + miR-222-3p + miR-451                                                   | Dohmen, 2022 [91]       | 69  | Germany | CRC <i>vs</i> NL  | Serum  | -/-           | 0.900 | 0.05   |
| miR-21-5p + miR-29a-3p + miR-125b-5p                                                                                                                        | Yamada, 2015 [93]       | 188 | USA     | CRC <i>vs</i> NL  | Serum  | -/-           | 0.828 | -      |
| miR-18a-5p + miR-20a-5p + miR-21-5p + miR-92a-3p + miR-143-5p + miR-145-5p + miR-181b-5p + miR-29a-3p + miR-106b-5p + miR-133a-5p + miR-342-3p + miR-532-3p | Lou, 2013 [116]         | 280 | Germany | CRC + H           | Plasma | -/-           | 0.803 | -      |
| miR-16-5p + miR-19a-3p + miR-21-5p + miR-34a-5p + miR-222-3p                                                                                                | Dohmen, 2022 [91]       | 69  | Germany | CRC <i>vs</i> NL  | Serum  | -/-           | 0.800 | 0.05   |
| miR-16-5p + miR-34a-5p                                                                                                                                      | Dohmen, 2022 [91]       | 69  | Germany | CRC <i>vs</i> NL  | Serum  | -/-           | 0.740 | 0.05   |

Table S2. Cont.

| MicroRNAs combinations                                                                     | Author, year             | N   | Country     | Compared Groups         | Sample | SEN/SPE (%)   | AUC   | p |
|--------------------------------------------------------------------------------------------|--------------------------|-----|-------------|-------------------------|--------|---------------|-------|---|
| miR-21-5p + miR-29a-3p + miR-92a-3p                                                        | Shiosaki, 2020 [72]      | 91  | Japan       | CRC <i>vs</i> NL        | Serum  | -/ -          | 0.639 | - |
| miR-19a-5p + miR-20a-5p + miR-143-5p + miR-145-5p + miR-150-5p + let-7a-3p                 | Maminezhad, 2020 [32]    | 90  | Iran        | -                       | Serum  | -/ -          | -     | - |
| miR-103a-3p + miR-127-3p + miR-151a-5p + miR-17-5p + miR-181a-5p + miR-18a-5p + miR-18b-5p | Zhang, 2019 [95]         | 271 | China       | -                       | Plasma | -/ -          | -     | - |
| miR-34b-3p + miR-34c-5p                                                                    | Wu, 2014 [118]           | 122 | China       | CRC <i>vs</i> H         | Stool  | 95.00/ 100.00 | -     | - |
| miR-92a-3p + miR-144-5p                                                                    | Choi, 2019 [27]          | 58  | South Korea | CRC <i>vs</i> NL        | Stool  | 96.60/ 37.90  | -     | - |
| miR-21-5p + miR-146a-5p                                                                    | Liu, 2016 [73]           | 270 | China       | CRC <i>vs</i> H         | Stool  | 87.00/ 81.70  | 0.878 | - |
|                                                                                            |                          |     |             | CRA <i>vs</i> H         |        | 78.90/ 66.80  | 0.761 | - |
| miR-20a-5p + miR-135b-5p                                                                   | Yau, 2015 [119]          | 595 | China       | CRC <i>vs</i> NL        | Stool  | 79.00/ 65.00  | 0.790 | - |
| miR-223-3p + miR-92a-3p + miR-16-5p + miR-106b-5p                                          | Chang, 2016 [29]         | 323 | Taiwan      | CRC <i>vs</i> NL        | Stool  | 73.90/ 82.20  | 0.840 | - |
| miR-223-3p + miR-92a-3p                                                                    | Chang, 2016 [29]         | 323 | Taiwan      | CRC <i>vs</i> NL        | Stool  | 71.70/ 79.90  | 0.810 | - |
| miR-18a-5p + miR-221-3p                                                                    | Yau 2014 [106]           | 595 | China       | CRC <i>vs</i> NL        | Stool  | 66.00/ 75.00  | 0.750 | - |
| miR-135a-5p + miR-135b-5p                                                                  | Wu, 2014 [57]            | 424 | China       | CRA <i>vs</i> NL        | Stool  | 61.00/ 58.40  | -     | - |
|                                                                                            |                          |     |             | AA <i>vs</i> NL         |        | 73.00/ 58.80  | -     | - |
|                                                                                            |                          |     |             | CRC-I-II <i>vs</i> NL   |        | 67.00/ 58.40  | -     | - |
|                                                                                            |                          |     |             | CRC-III-IV <i>vs</i> NL |        | 80.00/ 58.40  | -     | - |
| miR-20a-5p + miR-92a-3p                                                                    | Yau, 2015 [119]          | 595 | China       | CRC <i>vs</i> NL        | Stool  | 57.00/ 84.00  | 0.770 | - |
| miR-27a-3p + miR-421                                                                       | Duran-Sanchon, 2020 [20] | 767 | Spain       | AA <i>vs</i> NL         | Stool  | 59.00/-       | 0.930 | - |

Abbreviation: miR: microRNA; NL: No Lesion; CRA: Colorectal Adenoma; AA: Advanced Adenoma; CRC: Colorectal Cancer; CRC-I: CRC in stage I; CRC-II: CRC in stage II; CRC-III: CRC in stage III; CRC-IV: CRC in stage IV; CRC-I-II: CRC in stage I or II; CRC-III-IV: CRC in stage III or IV; AUC: Area under the curve; p: p asymptotic.
